# Supplementary material for: Integrative Bioinformatics of Bulk and Single-Cell Transcriptomes Identifies Predictive Molecular Features of Ulcerative Colitis-Associated Colorectal Cancer
Source: Research Square preprint supplement (doi:10.21203/rs.3.rs-8417562/v1), 2026-01-14
Supplement: Supplementary file 1 [file 536fd8a967780ac4b1f23f22.xlsx]

## Sheet: Sheet1
Name	Module	Name	Module
TFF1	yellow	LGALS4	blue
LCN2	yellow	SLC26A3	blue
SERPINB1	yellow	FABP1	blue
PI3	yellow	KRT20	blue
HSPA5	yellow	C15orf48	blue
ODC1	yellow	CA2	blue
DNAJB11	yellow	SELENOP	blue
PSMB8	yellow	GUCA2A	blue
INPP1	yellow	UGP2	blue
FHL2	yellow	COX5A	blue
ISG20	yellow	CKB	blue
GLRX	yellow	MT2A	blue
PNP	yellow	PRDX6	blue
TAP1	yellow	FAM3D	blue
UBE2L6	yellow	ITM2C	blue
ANXA2	yellow	PLS1	blue
CD55	yellow	MT1G	blue
ANXA3	yellow	CA1	blue
PSMB9	yellow	TST	blue
ERRFI1	yellow	CDH17	blue
LAMA3	yellow	SLC26A2	blue
CASP1	yellow	INSL5	blue
IRF1	yellow	SELENBP1	blue
BACE2	yellow	MS4A12	blue
EPSTI1	yellow	XBP1	blue
PLAUR	yellow	CHGA	blue
CXCL2	yellow	NANS	blue
NMI	yellow	ADH1C	blue
CXCL1	yellow	GCG	blue
LAP3	yellow	MANF	blue
NCOA7	yellow	CES2	blue
STAT1	yellow	ETHE1	blue
GBP2	yellow	ATP8B1	blue
LYN	yellow	PRDX4	blue
DUOX2	yellow	HEPACAM2	blue
CASP5	yellow	DSP	blue
GBP1	yellow	SDCBP2	blue
IL1B	yellow	NXPE4	blue
CXCL9	yellow	PARM1	blue
XAF1	yellow	CLRN3	blue
BTN3A3	yellow	PLA2G10	blue
TRIM22	yellow	SMPDL3A	blue
CXCL10	yellow	SYTL2	blue
PARP9	yellow	KLF5	blue
IDO1	yellow	KLK1	blue
PARP14	yellow	CFTR	blue
CXCL3	yellow	GNA11	blue
FCGR3A	yellow	TDP2	blue
KLHL24	yellow	GGH	blue
SERPINB5	yellow	HMGCS2	blue
IFIT5	yellow	PDCD4	blue
S100A8	yellow	PRR15	blue
SERPINB8	yellow	MAOA	blue
APOL1	yellow	SMIM14	blue
SAMD9L	yellow	ARPC1B	blue
S100A9	yellow	PRR15L	blue
AEN	yellow	VSIG2	blue
NOS2	yellow	PRSS3	blue
LAMC2	yellow	MYDGF	blue
APOL3	yellow	GPR160	blue
IL15RA	yellow	TMEM54	blue
TFF2	yellow	SORL1	blue
APOL2	yellow	PRAC1	blue
C4BPB	yellow	TMEM98	blue
REG1A	yellow	SH3BGRL2	blue
ZC3H12A	yellow	MT1M	blue
BTN3A1	yellow	SRI	blue
CXCR6	yellow	PPP1R1B	blue
MCUB	yellow	EPB41L4B	blue
TYMP	yellow	ANXA5	blue
IFIT3	yellow	CAMK2N1	blue
ETV7	yellow	TMC4	blue
ICAM1	yellow	CDX1	blue
DRAM1	yellow	PAQR8	blue
CXCL8	yellow	PPP1R14D	blue
PTGS2	yellow	ST6GALNAC1	blue
TRIM29	yellow	ATP1B3	blue
GZMB	yellow	HSD17B2	blue
CASP10	yellow	AHCYL2	blue
REG3A	yellow	RNF128	blue
C2CD4A	yellow	NXPE1	blue
FFAR2	yellow	C4orf19	blue
IFI44	yellow	TSPAN6	blue
REG1B	yellow	MT1F	blue
CSF3R	yellow	CHP2	blue
ZBP1	yellow	SDF2L1	blue
OAS2	yellow	ABHD3	blue
PDE4B	yellow	CDX2	blue
GBP5	yellow	GUCA2B	blue
STX11	yellow	TMIGD1	blue
LIPG	yellow	TMEM45B	blue
FCN1	yellow	GIPC1	blue
SOCS1	yellow	F2RL1	blue
GBP4	yellow	ZNF91	blue
CXCL11	yellow	GUCY2C	blue
DUOXA2	yellow	PTPRF	blue
SOCS3	yellow	CDS1	blue
FPR1	yellow	REP15	blue
GNA15	yellow	STAP2	blue
SAA1	yellow	CYP2J2	blue
TCN1	yellow	CLDN8	blue
MAP3K8	yellow	MYO1D	blue
MMP7	yellow	C6orf136	blue
CLEC4E	yellow	TRABD2A	blue
TNIP3	yellow	HPGD	blue
S100A12	yellow	BCAS1	blue
HAPLN3	yellow	MPST	blue
NAMPT	yellow	OAF	blue
AQP9	yellow	LRRC19	blue
TREM1	yellow	ESRP2	blue
CD300E	yellow	C2orf88	blue
LILRA5	yellow	IMPA2	blue
TNFRSF10C	yellow	WFDC2	blue
OSM	yellow	SAMD13	blue
IFI44L	yellow	ELF3	blue
DUOXA1	yellow	CASD1	blue
FPR2	yellow	GATA6	blue
CXCR1	yellow	MEP1A	blue
CD274	yellow	ENDOD1	blue
CXCR2	yellow	TMEM171	blue
SLC11A1	yellow	MTHFD2	blue
DUOX1	yellow	GALNT12	blue
PROK2	yellow	ATP2C2	blue
NPSR1-AS1	yellow	LLGL2	blue
SERPINB7	yellow	DNAJB9	blue
FCAR	yellow	HSBP1L1	blue
NPSR1	yellow	RETSAT	blue
MEFV	yellow	FXYD3	blue
CLEC4D	yellow	LIPH	blue
KCNJ15	yellow	EPHX2	blue
SERPINB3	yellow	SPINT1	blue
SERPINB4	yellow	ST6GALNAC6	blue
		PHYH	blue
		PPARG	blue
		MYO1A	blue
		BEST2	blue
		CRYL1	blue
		AQP8	blue
		RFLNA	blue
		TMPRSS4	blue
		ANXA1	blue
		NDRG2	blue
		TIMP1	blue
		ACSS2	blue
		PKIB	blue
		RHBDL2	blue
		TOX3	blue
		SLC51B	blue
		MTMR11	blue
		MCRIP2	blue
		HOXA13	blue
		HOOK1	blue
		NEURL1B	blue
		TRPM4	blue
		F3	blue
		TSPAN7	blue
		MPND	blue
		BTNL8	blue
		MT1H	blue
		CALU	blue
		SLC44A3	blue
		MIER3	blue
		SCGB2A1	blue
		SIAE	blue
		NEDD4L	blue
		USH1C	blue
		ALKBH7	blue
		NAT2	blue
		MRPL41	blue
		IGF2BP2	blue
		ACOX1	blue
		TMEM120A	blue
		PRR5L	blue
		CPNE2	blue
		TMCC3	blue
		TACC2	blue
		LAMA1	blue
		BTNL3	blue
		STX3	blue
		QPRT	blue
		GJB1	blue
		PCK1	blue
		CA7	blue
		A1CF	blue
		SULT1B1	blue
		CAPN5	blue
		MLKL	blue
		HOXB13	blue
		CLMN	blue
		ANKS4B	blue
		GPD1L	blue
		COMTD1	blue
		GGT6	blue
		CCDC68	blue
		BCAT2	blue
		PITPNC1	blue
		TCEA3	blue
		SATB2	blue
		SCIN	blue
		SLC16A1	blue
		TSHZ1	blue
		NR3C2	blue
		SCNN1B	blue
		NNMT	blue
		CTDSPL	blue
		C1orf115	blue
		VAV3	blue
		GPRC5C	blue
		NIPAL1	blue
		CMTM4	blue
		STX19	blue
		MT1E	blue
		SPR	blue
		PLCD1	blue
		SLC4A4	blue
		EXPH5	blue
		PLCE1	blue
		BCL2L14	blue
		UGT2A3	blue
		ACADS	blue
		SLC39A5	blue
		CXADR	blue
		ANK3	blue
		TFCP2L1	blue
		PTPRH	blue
		CDKN2B	blue
		PBLD	blue
		P2RX4	blue
		ABCB1	blue
		CASP4	blue
		PCK2	blue
		CYP4F12	blue
		RAB17	blue
		PLXNA2	blue
		HHLA2	blue
		FUT8	blue
		ENTPD5	blue
		RHOU	blue
		MFSD4A	blue
		ZDHHC23	blue
		HYAL2	blue
		GIPC2	blue
		BDH1	blue
		CD44	blue
		BEST4	blue
		SLC20A2	blue
		LDHD	blue
		BICDL2	blue
		RAB40B	blue
		OVOL2	blue
		FMO5	blue
		MTM1	blue
		SEMA4G	blue
		FHDC1	blue
		CWH43	blue
		CCDC167	blue
		SLC9A2	blue
		LPCAT1	blue
		NHSL1	blue
		LRRC31	blue
		SLC22A18AS	blue
		ARHGEF16	blue
		RAVER2	blue
		MARVELD3	blue
		TMEM37	blue
		ZNF57	blue
		EDN3	blue
		PIGZ	blue
		C1orf210	blue
		NEO1	blue
		APPL2	blue
		KIAA1671	blue
		SMPDL3B	blue
		MXI1	blue
		RGMB	blue
		ADGRA3	blue
		C2orf72	blue
		SCNN1A	blue
		SGK2	blue
		ISX	blue
		VSIG10	blue
		SMIM6	blue
		MYO7B	blue
		TMEM144	blue
		AIFM3	blue
		SHD	blue
		MTARC2	blue
		CRELD2	blue
		FBXL15	blue
		IHH	blue
		ACAT1	blue
		IRF6	blue
		FAAH	blue
		PMM1	blue
		SEMA6A	blue
		FAM83E	blue
		NR2F6	blue
		SLC17A4	blue
		ACSF2	blue
		ANKRD9	blue
		CRB3	blue
		PLEKHG6	blue
		MNX1	blue
		HOXD13	blue
		FZD5	blue
		LPIN1	blue
		PADI2	blue
		SLC22A23	blue
		ITPKA	blue
		MAST2	blue
		NXPE2	blue
		MMP1	blue
		ZNF69	blue
		ELMO3	blue
		PTK6	blue
		TRPM6	blue
		ACOX2	blue
		PLEKHA6	blue
		HSPA13	blue
		ATP9A	blue
		B3GNT8	blue
		VIL1	blue
		PKDCC	blue
		TJP3	blue
		NLRC5	blue
		SH3RF2	blue
		ENTPD8	blue
		RAP1GAP	blue
		ZNF613	blue
		C9orf40	blue
		BAIAP2L2	blue
		ZNF350	blue
		CAPN13	blue
		PEX11A	blue
		DDC	blue
		TMEM253	blue
		CYP2S1	blue
		ELL2	blue
		PWWP2B	blue
		THSD4	blue
		SLC35G1	blue
		SCG2	blue
		PHLDA1	blue
		NR1I2	blue
		ILDR1	blue
		PPP1R36	blue
		WNK2	blue
		CNKSR3	blue
		SEC11C	blue
		CBLC	blue
		B3GALT5-AS1	blue
		STYK1	blue
		CTH	blue
		TLN2	blue
		STRADB	blue
		GPT	blue
		PECR	blue
		FGFR3	blue
		PTPRR	blue
		SPIRE2	blue
		LPGAT1	blue
		FOXD2	blue
		HNF4G	blue
		RMDN2	blue
		CLYBL	blue
		SLC13A2	blue
		USP30	blue
		MACROD1	blue
		FMO4	blue
		KCNK5	blue
		MMP3	blue
		C9orf152	blue
		NR5A2	blue
		OSBPL3	blue
		EPS8L2	blue
		HOXD10	blue
		NOXA1	blue
		REC8	blue
		AKAP7	blue
		KLC4	blue
		MAP3K21	blue
		CHDH	blue
		SEC14L1	blue
		CLCN2	blue
		NUAK2	blue
		TMEM53	blue
		CDC25B	blue
		ESPN	blue
		PLAU	blue
		PPP2R3A	blue
		B3GNT7	blue
		DUSP4	blue
		CNTN3	blue
		MAD2L2	blue
		ARHGAP44	blue
		IGSF9	blue
		SLC22A5	blue
		SOWAHB	blue
		OTOP2	blue
		ABCC1	blue
		RUNDC3B	blue
		SETD9	blue
		CES3	blue
		NBPF1	blue
		PPARGC1A	blue
		AQP11	blue
		TUBAL3	blue
		INSM1	blue
		SLC25A34	blue
		TMEM72	blue
		TMEM184A	blue
		ACVR1B	blue
		ZSWIM5	blue
		NGEF	blue
		PTGDR	blue
		PCSK5	blue
		MARVELD2	blue
		ACOT11	blue
		SCGN	blue
		COL7A1	blue
		USP54	blue
		VIPR1	blue
		MOGAT2	blue
		ABCG2	blue
		NUDT7	blue
		RIMKLA	blue
		CRYBA2	blue
		PFKFB3	blue
		IL17RE	blue
		SOWAHA	blue
		CDKN2B-AS1	blue
		RNF24	blue
		ZBTB7C	blue
		NAAA	blue
		THRA	blue
		IL33	blue
		INPP5J	blue
		MAGI1	blue
		PCLO	blue
		ACVR1C	blue
		ZNF219	blue
		GDPD2	blue
		RAPGEFL1	blue
		RORC	blue
		GAL3ST4	blue
		CDHR1	blue
		ADGRV1	blue
		CHN2	blue
		ATP11A	blue
		GPRIN2	blue
		KIF12	blue
		PDK2	blue
		SHROOM1	blue
		TTLL6	blue
		RFX6	blue
		AGFG2	blue
		TRIM36	blue
		VANGL2	blue
		PTP4A3	blue
		AKAP5	blue
		NEURL1	blue
		TNFAIP6	blue
		FEV	blue
		SERINC5	blue
		KRTAP13-2	blue
		RNF213	blue
		IYD	blue
		PGAP3	blue
		CFI	blue
		ALPI	blue
		GPR39	blue
		LTK	blue
		KIFC3	blue
		ADAMTS9	blue
		OLFML2B	blue
		SSTR1	blue
		THRB	blue
		COBL	blue
		GRAMD1C	blue
		CHI3L1	blue
		CACNA1A	blue
		CEMIP	blue
		RPL10L	blue
		PDE3A	blue
		GAL3ST1	blue
		PROM2	blue
		ABAT	blue
		CHGB	blue
		LILRB2	blue
		PPARGC1B	blue
		SLC36A1	blue
		PDE6A	blue
		WNK4	blue
		HOXD9	blue
		TTR	blue
		TMEM8B	blue
		CTHRC1	blue
		LRP8	blue
		PLEKHH1	blue
		ACSL4	blue
		IGSF3	blue
		ANO7	blue
		SLC25A23	blue
		TTPA	blue
		PRLR	blue
		IKBIP	blue
		ENPP1	blue
		FAM162A	blue
		GLRA2	blue
		CHSY1	blue
		CCNJL	blue
		EPN3	blue
		PIWIL2	blue
		SPHK1	blue
		MAML3	blue
		SLC30A10	blue
		RALGPS1	blue
		TESK2	blue
		FAM110C	blue
		SCN9A	blue
		ZBTB10	blue
		KCNB2	blue
		APBA1	blue
		FANK1	blue
		CLDN2	blue
		SYT17	blue
		CDC14A	blue
		SLC6A7	blue
		ZNF774	blue
		SYT7	blue
		P2RY1	blue
		RBM24	blue
		SATB2-AS1	blue
		PHF7	blue
		SHANK2	blue
		MMP10	blue
		GRB7	blue
		FRMD1	blue
		GRHL2	blue
		CDK20	blue
		MDFI	blue
		PLA2G12B	blue
		CDKL1	blue
		WNT5A	blue
		CEP128	blue
		CLDN1	blue
		PHLPP2	blue
		KRT7	blue
		CARD6	blue
		ZFP3	blue
		PPM1L	blue
		KRT6C	blue
		CAP2	blue
		CPA6	blue
		KLK6	blue
		RNF152	blue
		KIF5C	blue
		CCDC152	blue
		SLC6A6	blue
		FGFR2	blue
		CPXM1	blue
		SMOX	blue
		STC1	blue
		PARS2	blue
		RIMBP2	blue
		CNGA1	blue
		DSCAML1	blue
		NPY4R	blue
		SGSM1	blue
		ATP13A4	blue
		AQP7	blue
		HMGA2	blue
		SLC10A5	blue
		GRIP2	blue
		KCNJ6	blue
		LRIT2	blue
		PDPN	blue
		BMP3	blue
		DPP10	blue
		AMER3	blue
		EVX2	blue
		KLK10	blue
		VSIG1	blue
		AGTR1	blue
		KRT6B	blue
		CHAD	blue
		LMX1A	blue
		CDKL2	blue
		KLK7	blue
		FMN2	blue
		IGSF5	blue
		HOXD12	blue
		ZNF704	blue
		C10orf55	blue
		KRT6A	blue
